# Supplementary material for: Gain-of-Function RHOA Mutations Promote Focal Adhesion Kinase Activation and Dependency in Diffuse Gastric Cancer
Source: Oxford University Press journal article supplement (doi:10.1158/2159-8290.cd-19-0811), 2019-11-26
Supplement: 21598290cd190811-sup-225521_2_supp_5909265_q173vl.xlsx [file 21598290cd190811-sup-225521_2_supp_5909265_q173vl.xlsx]

## Sheet: Sheet1
Primers for genotyping
Gene	Primers		PCR cycle											Gel []	Size (bp)
			Step 1		Denature		Anneal		Extension		Final Extension		Cycles
Cdh1	F: GGG TCT CAC CGT AGT CCT CA	R:GAT CTT TGG GAG AGC AGT CG	94°C	3min	94°C	30sec	67°C	30sec	72°C	30sec	72°C	2 mins	35	0.015	W: 243, M: 310
Rosa26-TomatoGFP	F: CTCTGCTGCCTCCTGGCTTCT	R: TCAATGGGCGGGGGTCGTT	94°C	3min	94°C	45sec	61°C	1min	72°C	1min	72°C	7 mins	37	0.012	250
Cre	F: GCG GTC TGG CAG TAA AAA CTA TC	R:GTG AAA CAG CAT TGC TGT CAC TT	94°C	3min	94°C	30sec	59°C	1min	72°C	1min	72°C	2 mins	36	0.012	100
RHOA (Col1a1)	F:CCGCCATCCCAACAATACATC	5R:GTGAGATCAAGGGTGACCCAA	94°C	2min	94°C	30sec	60°C	30sec	68°C	30sec	68°C	5 mins	32	0.015	W: 282, M: 147
		3R:AGCCACCACTTTCTGATAGGCA
